# Supplementary material
Source: bioRxiv or medRxiv preprint supplement (https://medrxiv.org/highwire/filestream/83069/field_highwire_adjunct_files/0/2020.05.24.20100990-1.pdf)

**Performance evaluation of the point-of-care SAMBA II SARS-CoV-2 Test for  
detection of SARS-CoV-2**

**Running Title:** SAMBA II SARS-CoV-2 analytical and clinical evaluation

**Authors:** Allyson V Ritchie<sup>1\*</sup>, Sonny M Assennato<sup>1\*</sup>, Cesar Nadala<sup>2</sup>, Hongyi

Zhang<sup>3</sup>, Rawlings Datir<sup>4</sup>, Ravindra K Gupta<sup>5,6</sup>, Martin D Curran<sup>3\*\*</sup>, Helen Lee<sup>1,2\*\*</sup>

**Supplementary information**

Correspondence curve of the PHE Cambridge (Wuhan) test generated by testing serial dilutions of the Multi Control Array Plasmid 9 containing SARS-COV-2 targets with initial concentration of 3,508,000 cp/mL.

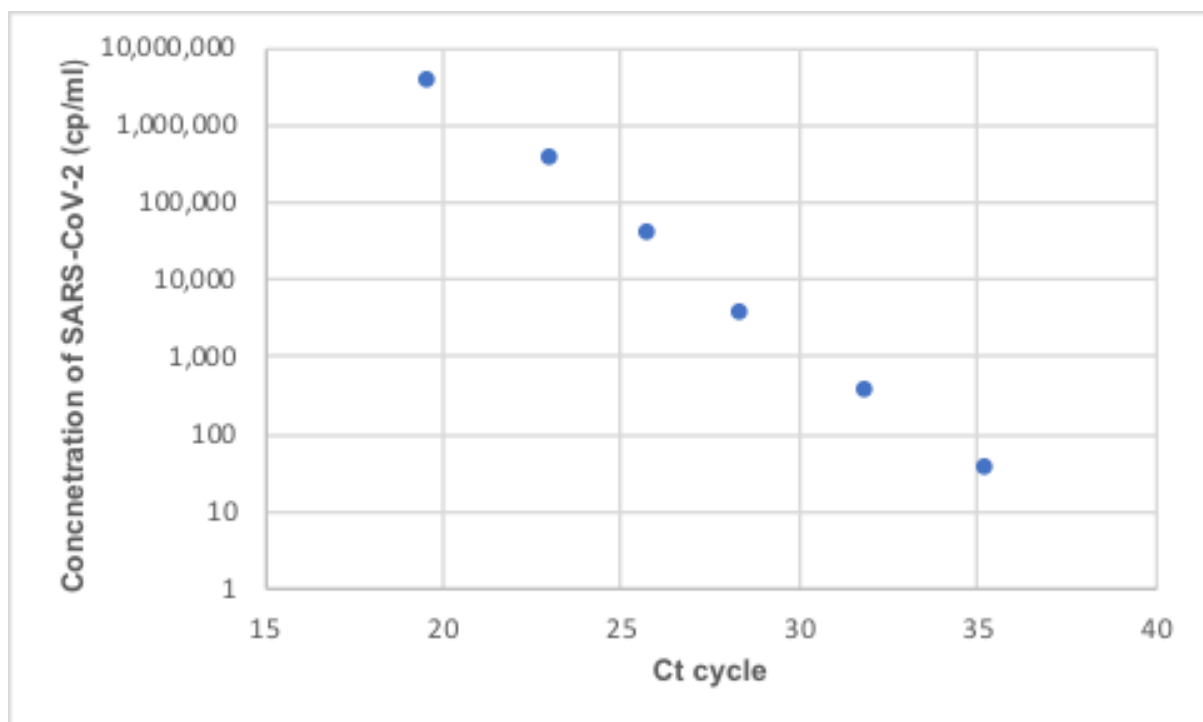

Supplement: Supplementary file [file 2020.05.24.20100990-1.pdf]
